# Supplementary material
Source: publisher figshare collection journal article supplement (https://acs.figshare.com/ndownloader/files/5196196)

Disappearance of photoproduct of EFDPC crystal with UV irradiation time,  
 $\lambda_{\text{irr}} \approx 350 \text{ nm}$ , Optical microscopic image taken by CCD camera. Light source  
is arc Xenon lamp, (Hamamatsu Photocure-200 UV-spot source) , The incident photon  
energy density is  $\sim 0.15 \text{ mW/cm}^2$

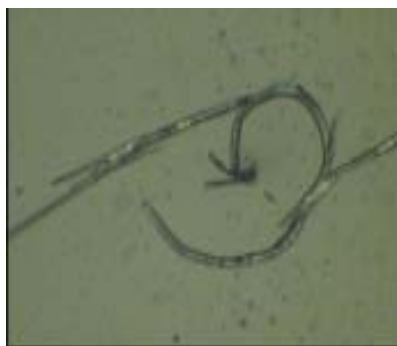

0 min

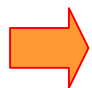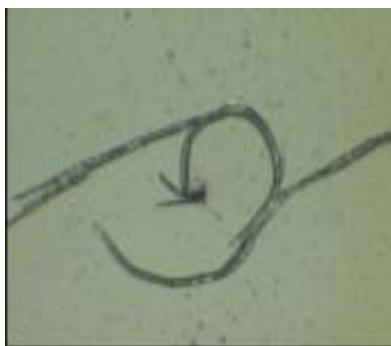

5 min

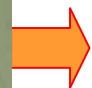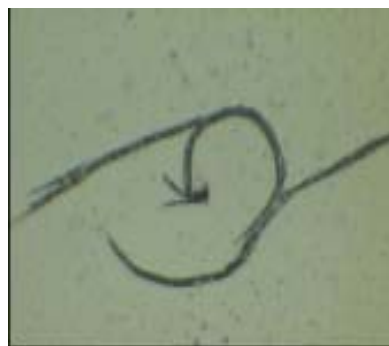

10 min

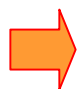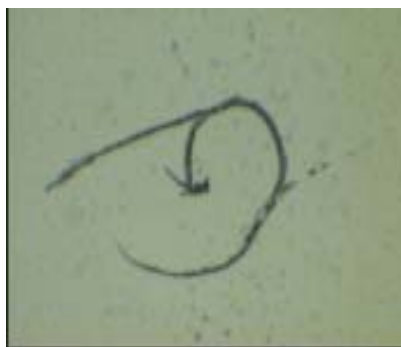

40 min

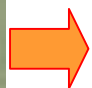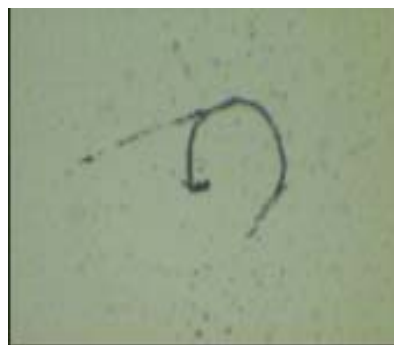

70 min

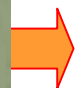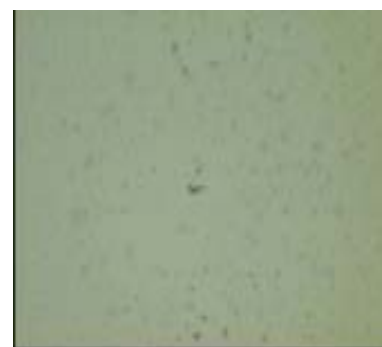

100 min

AFM image monitoring the change of surface morphology of cast film of EFPDC photoproduct as function of photo-irradiation time. (a) 0, (b) 5, (c) 10, (d) 20, (e) 50 and (f) 75 minutes respectively.  $\lambda_{\text{irr}} = 350\text{nm}$ . Light source arc Xenon lamp, (Hamamatsu Photocure-200 UV-spot source), The incident photon energy density is ca.  $\sim 0.15\text{mW}/\text{cm}^2$

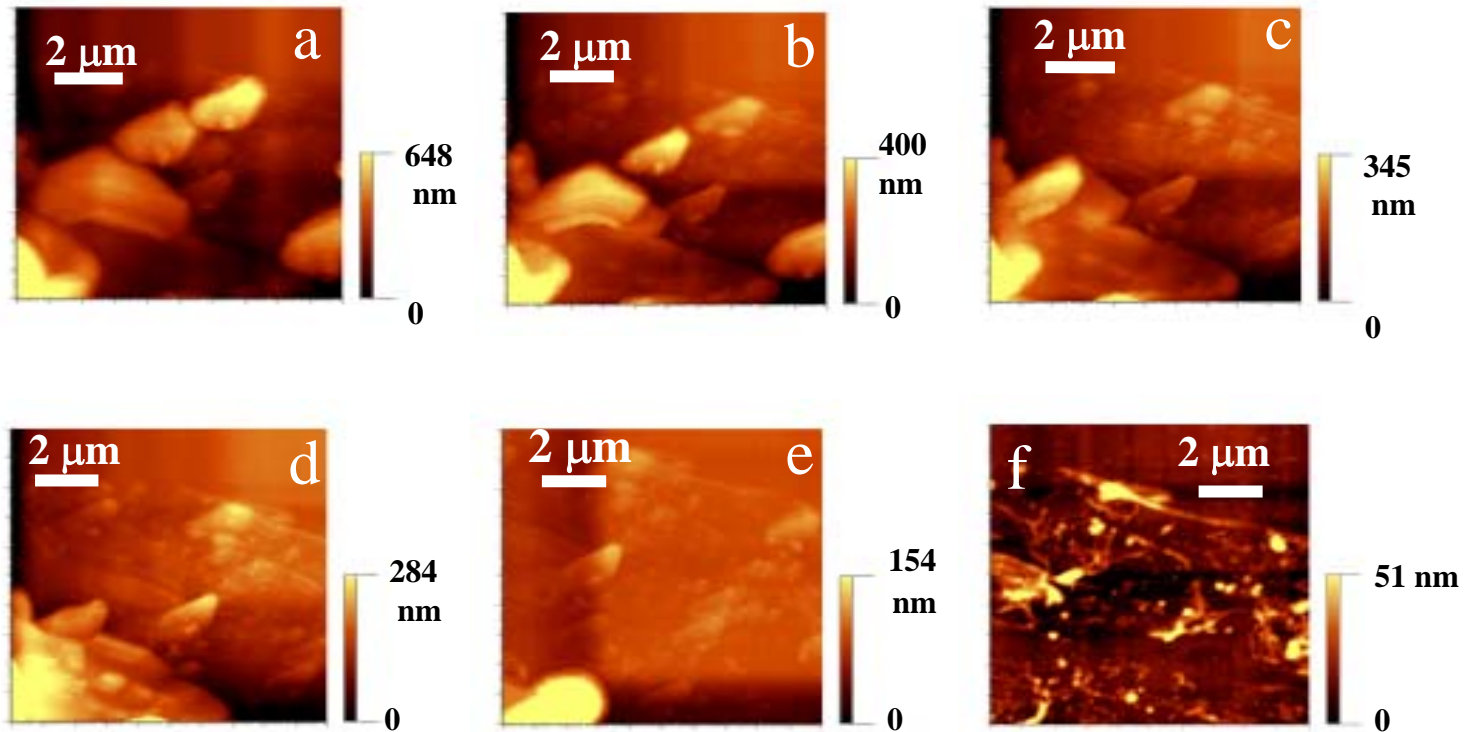

Supplement: Supplementary file 1 [file 5196196]
